# Supplementary material for: Three-dimensional human neural culture on a chip recapitulating neuroinflammation and neurodegeneration
Source: Springer Nature journal article supplement (doi:10.1038/s41596-023-00861-4), 2023-08-04
Supplement: MOESM1 [file 41596_2023_861_MOESM1_ESM16.pdf]

# Three-dimensional human neural culture on a chip recapitulating neuroinflammation and neurodegeneration

---

In the format provided by the  
authors and unedited

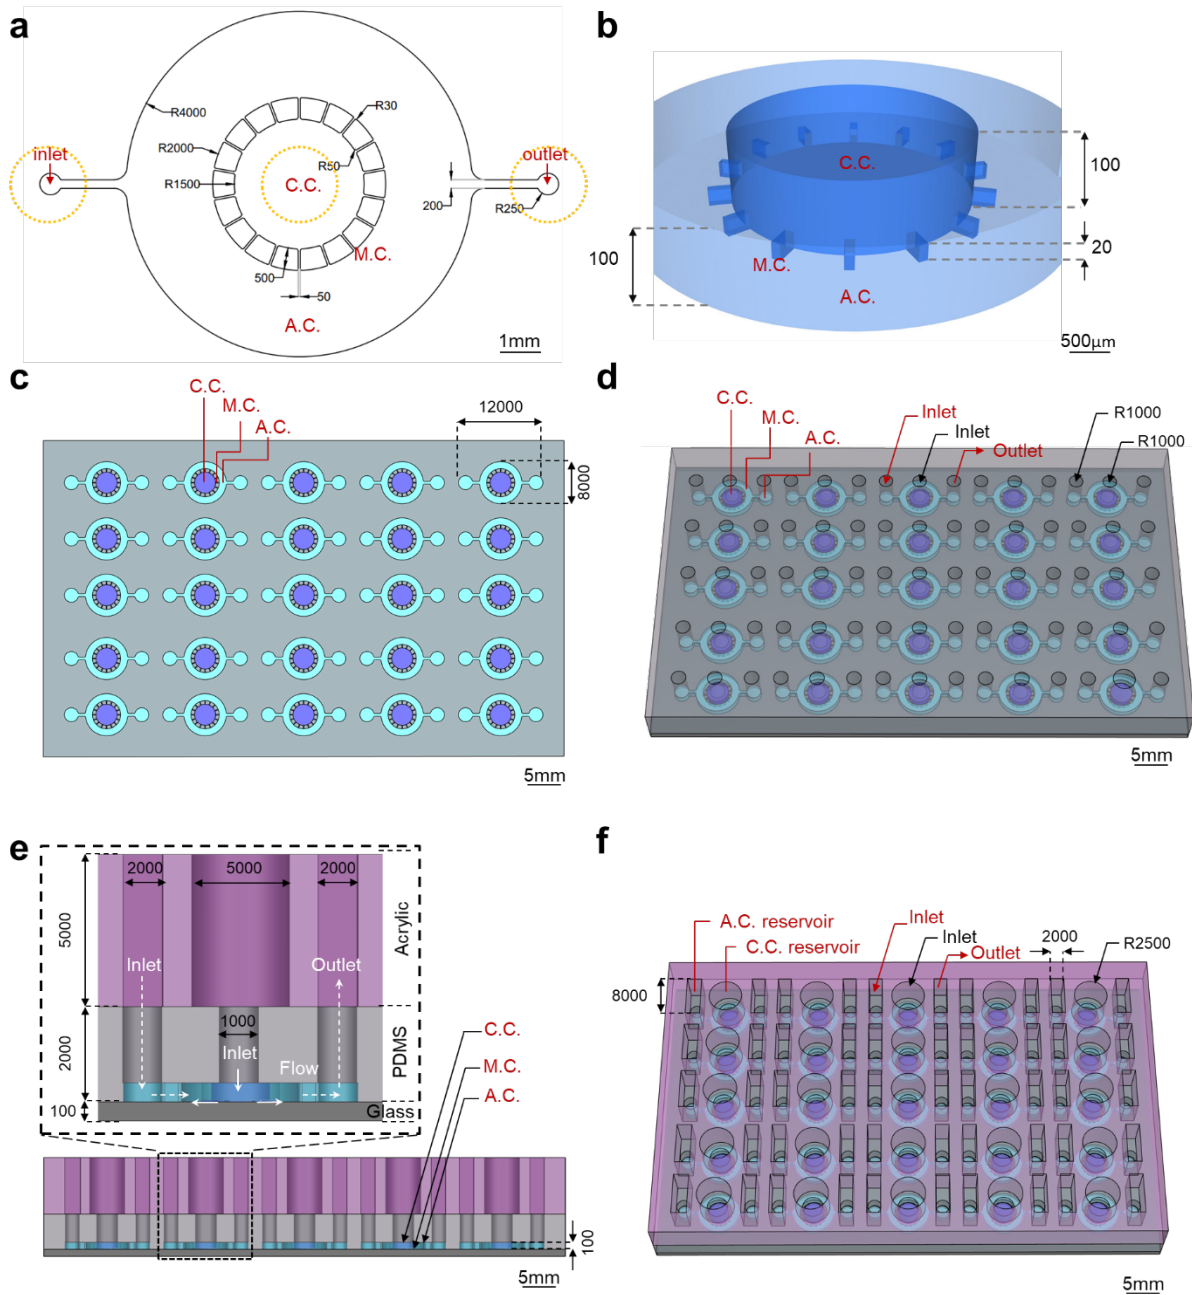

**Supplementary Fig. 1 | Dimensions of the human BoC model.** **a-b**, Dimensions of the chip design for a single model platform in top view and 3D view. C.C.: central chamber; A.C.: annular chamber; M.C.: migration channel. A 2-mm puncher will be used to make a hole in the C.C. and two holes in the A.C. for fluid inlet (marked yellow, see Step 5). **c-d**, Dimensions of arrayed platforms in top view and 3D view. **e**. Dimensions of the assembled BoC for a single model platform and arrayed platforms in side view. **f**. Dimensions of arrayed BoCs in 3D view.

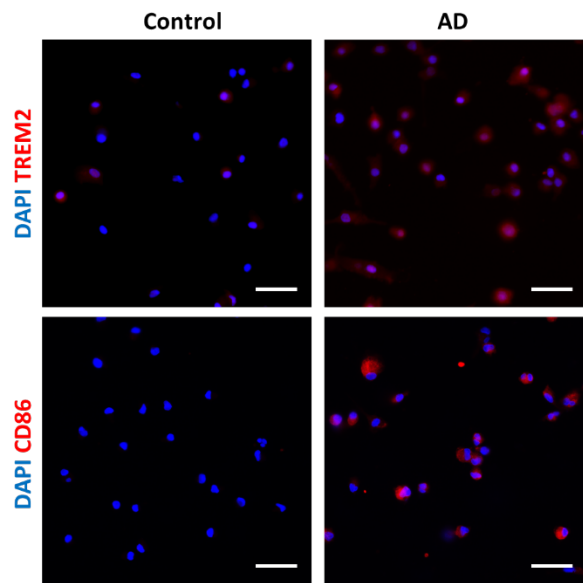

**Supplementary Fig. 2 | Induction of DAM and M1 types of microglia in “human AD BoC”.** iMG cells exposed to conditioned media from AD BoCs retained DAM (TREM2-positive) and M1 (CD86-positive) phenotypes. Scale bars represent 50  $\mu\text{m}$ .

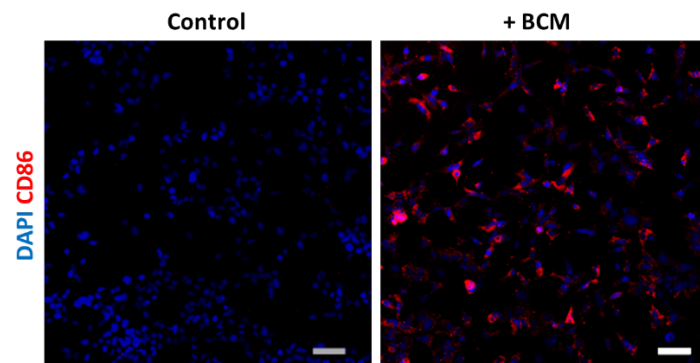

**Supplementary Fig. 3 | Induction of M1 type microglia in “human infected BoC”.** SV40 microglia exposed to bacterial conditioned media (+BCM) retained M1 (CD86-positive) phenotype. Scale bars represent 100 μm.

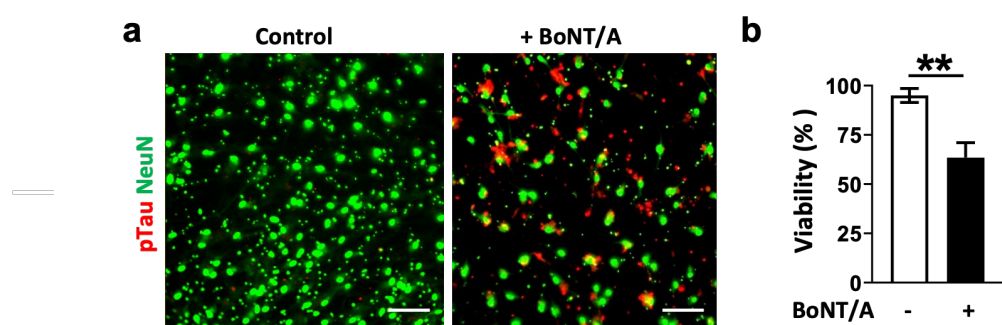

**Supplementary Fig. 4 | Promotion of tau accumulation and neurodegeneration in “human infected BoC”.** **a**, Our BoCs exposed to bacteria-derived toxin (+BoNT/A) promoted hyperphosphorylated tau deposition (pTau-positive) near neuros (NeuN-positive). Scale bars represent 100  $\mu$ m. **b**, Induction of neurodegeneration by BoNT/A treatment. Reduction of neural population was analyzed by counting NeuN-positive cells per unit area from fluorescent images (N=4).

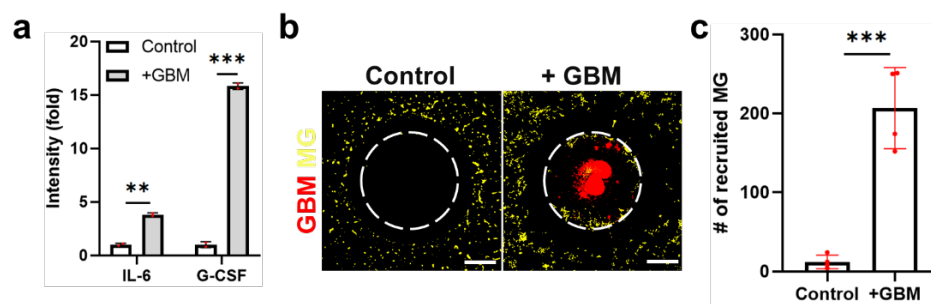

**Supplementary Fig. 5 | Validation of microglial recruitment and activation in response to “human tumor BoC”.**

**a**, Multicytokine assay was performed with conditioned medium from central chambers to investigate any proinflammatory response in human tumor BoCs. The levels of cytokines such as IL-6 and G-CSF were significantly increased in human tumor BoCs (+GBM) compared to Control (N=2). **b**, Fluorescent images representing the microglial recruitment (MG, marked yellow) towards GBM spheroid (+GBM, marked red) in the central compartment (marked dash-line). Scale bars represent 1 mm. **c**, Quantification for recruited microglia found in the central chamber (N=4).

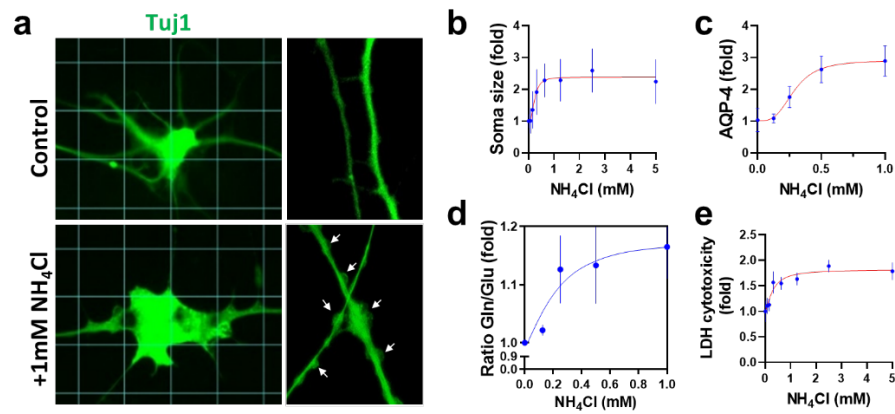

**Supplementary Fig. 6 | Validation of “human edema BoC”.** **a**, Induction of neuronal swelling in edema BoCs. Each grid represents 10  $\mu$ m. **b-e**, The soma size of neurons, expression level of AQP-4 in astrocytes, glutamine/glutamate ratio, and cytotoxicity were significantly increased in hyper-ammonia conditions, validating the induction of edema conditions (N=10).

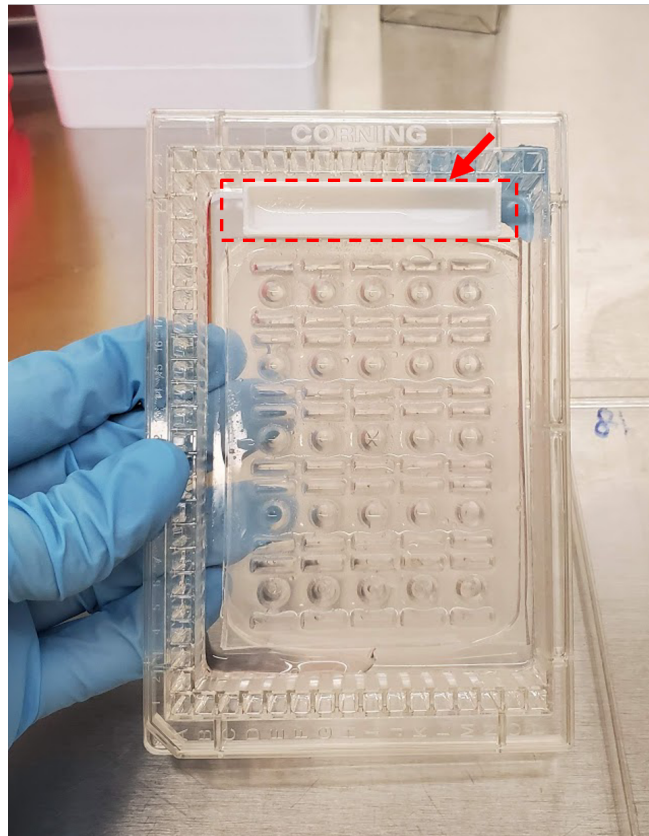

**Supplementary Fig. 7 | Additional humid chamber installed in the device.**
